# Supplementary material for: A New Orbiting Deployable System for Small Satellite Observations for Ecology and Earth Observation
Source: MDPI journal article supplement (doi:10.3390/rs14092066), 2022-04-26
Supplement: s1 [file s1]

# A new Orbiting Deployable System for Small Satellite Observations for Ecology and Earth Observation

Elena Martellato <sup>1,\*</sup>, Alice Maria Piccirillo <sup>1</sup>, Giampaolo Ferraioli <sup>1</sup>, Alessandra Rotundi <sup>1,2</sup>, Vincenzo Della Corte <sup>2</sup>, Pasquale Palumbo <sup>1,2</sup>, Emanuele Alcaras <sup>1</sup>, Luca Appolloni <sup>1</sup>, Giuseppe Aulicino <sup>1</sup>, Ivano Bertini <sup>1</sup>, Vincenzo Capozzi <sup>1</sup>, Elena Catucci <sup>1</sup>, Zelia Dionnet <sup>3</sup>, Pasquale Di Palma <sup>1</sup>, Flavio Esposito <sup>1</sup>, Emanuele Ferrentino <sup>1</sup>, Anna Innac <sup>1</sup>, Laura Inno <sup>1</sup>, Silvia Pennino <sup>1</sup>, Simona Saviano <sup>1,4</sup>, Giuseppina Tirimberio <sup>1,5</sup>, Stefania Campopiano <sup>1</sup>, Elena Chianese <sup>1</sup>, Pier Paolo Franzese <sup>1</sup>, Giannetta Fusco <sup>1</sup>, Salvatore Gaglione <sup>1</sup>, Agostino Iadicicco <sup>1</sup>, Ferdinando Nunziata <sup>1</sup>, Claudio Parente <sup>1</sup>, Vincenzo Piscopo <sup>1</sup>, Angelo Riccio <sup>1</sup>, Giovanni Fulvio Russo <sup>1</sup> and Enrico Zambianchi <sup>1</sup>

- <sup>1</sup> Department of Sciences and Technologies, University of Napoli “Parthenope”, Centro Direzionale Isola C4, 80143 Napoli, Italy; elena.martellato@collaboratore.uniparthenope.it (E.M.); alicemaria.piccirillo001@studenti.uniparthenope.it (A.M.P.); giampaolo.ferraioli@uniparthenope.it (G.F.); rotundi@uniparthenope.it (A.R.); pasquale.palumbo@uniparthenope.it (P.P.); emanuele.alcaras@studenti.uniparthenope.it (E.A.); luca.appolloni@collaboratore.uniparthenope.it (L.A.); giuseppe.aulicino@uniparthenope.it (G.A.); ivano.bertini@uniparthenope.it (I.B.); vincenzo.capozzi@collaboratore.uniparthenope.it (V.C.); elena.catucci@uniparthenope.it (E.C.); pasquale.dipalma@collaboratore.uniparthenope.it (P.D.P.); flavio.esposito@collaboratore.uniparthenope.it (F.E.); emanuele.ferrentino@uniparthenope.it (E.F.); anna.innac@collaboratore.uniparthenope.it (A.I.); laura.inno@uniparthenope.it (L.I.); silvia.pennino@uniparthenope.it (S.P.); simona.saviano@collaboratore.uniparthenope.it (S.S.); giuseppina.tirimberio@unicampania.it (G.T.); stefania.campopiano@uniparthenope.it (S.C.); elena.chianese@uniparthenope.it (E.C.); pierpaolo.franzese@uniparthenope.it (P.P.F.); giannetta.fusco@uniparthenope.it (G.F.); salvatore.gaglione@uniparthenope.it (S.G.); agostino.iadicicco@uniparthenope.it (A.I.); ferdinando.nunziata@uniparthenope.it (F.N.); claudio.parente@uniparthenope.it (C.P.); vincenzo.piscopo@uniparthenope.it (V.P.); angelo.riccio@uniparthenope.it (A.R.); giovanni.russo@uniparthenope.it (G.F.R.); enrico.zambianchi@uniparthenope.it (E.Z.)
- <sup>2</sup> Institute for Space Astrophysics and Planetology, National Institute for Astrophysics, Via Fosso del Cavaliere 100, 00133 Roma, Italy; vincenzo.dellacorte@inaf.it
- <sup>3</sup> Institut d’Astrophysique Spatiale, Université Paris-Saclay, Centre National de la Recherche Scientifique, Bat 120-121, 91405 Orsay, France; zelia.dionnet@universite-paris-saclay.fr
- <sup>4</sup> Department of Research Infrastructures for Marine Biological Resources, Stazione Zoologica Anton Dohrn, Villa Comunale, 80121 Naples, Italy
- <sup>5</sup> Department of Mathematics and Physics, University of Campania, Viale Lincoln, 5, 81100 Caserta, Italy
- \* Correspondence: elena.martellato@collaboratore.uniparthenope.it

**Citation:** Martellato, E.; Piccirillo, A.M.; Ferraioli, G.; Rotundi, A.; Della Corte, V.; Palumbo, P.; Alcaras, E.; Appolloni, L.; Aulicino, G.; Bertini, I.; et al. A new orbiting deployable system for small satellite observations for ecology and Earth Observation. *Remote Sens.* **2022**, *14*, 2062. <https://doi.org/10.3390/rs14092062>

Academic Editor: Michael Obland

Received: 28 January 2022

Accepted: 20 April 2022

Published: 25 April 2022

**Publisher’s Note:** MDPI stays neutral with regard to jurisdictional claims in published maps and institutional affiliations.

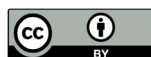

**Copyright:** © 2022 by the authors. Licensee MDPI, Basel, Switzerland. This article is an open access article distributed under the terms and conditions of the Creative Commons Attribution (CC BY) license (<https://creativecommons.org/licenses/by/4.0/>).

**Abstract:** In this paper, we present several study cases focused on marine, oceanographic, and atmospheric environments, which would greatly benefit from the use of a deployable system for small satellite observations. As opposed to the large standard ones, small satellites have become an effective and affordable alternative access to space, owing to their lower costs, innovative design and technology, and higher revisiting times, when launched in a constellation configuration. One of the biggest challenges is created by the small satellite instrumentation working in the visible (VIS), infrared (IR), and microwave (MW) spectral ranges, for which the resolution of the acquired data depends on the physical dimension of the telescope and the antenna collecting the signal. In this respect, a deployable payload, fitting the limited size and mass imposed by the small satellite architecture, once unfolded in space, can reach performances similar to those of larger satellites. In this study, we show how ecology and Earth observations can benefit from data acquired by small satellites, and how they can be further improved thanks to deployable payloads. We focus on DORA—Deployable Optics for Remote sensing Applications—in the VIS to TIR spectral range, and on a planned application in the MW spectral range, and we carry out a radiometric analysis to verify its performances for Earth observation studies.

**Keywords:** Earth Observation; remote sensing; deployable payload; optical instruments; radars; ocean; atmosphere; ecology

---

**Table S1.** The Table Lists all the medium to large space missions cited in the text, reporting all their relevant characteristics for the study cases in the spectral range from VIS to MW.

| Satellite Ac-<br>ronym | Satellite<br>Name                                                                                                                | Satellite<br>Class | Satellite Description & Main Goals                                                                                                                                                                                                                                                                                                                                                                                                                                                                                                                                                                                                                                                                                                                                      | Satellite<br>Weight<br>[kg] | Satellite Size                                                                                                                                    | Orbit Altitude<br>[km] | Payload                                                                                                                                                                                                                                                                                                          | Telescope or<br>Antenna<br>Aperture<br>Diameter<br>[mm]                    | f/Number<br>Focal<br>length | FoV / Beam-<br>width                                                                                                                             | Spatial Ground<br>Resolution [m]                                                                                                                                                                                         | SNR                                                | Swath width                                                                                                                                                                              | Spectral Range<br>[μm]*<br>/ Frequency                                                                                                                                                                                                                                          | Spectral<br>Resolution                                                                                                        | Polarimet-<br>ric capabil-<br>ities                                        | Revisiting<br>Time                                                                     | Constellation                                                                                                                         | Year*                                        | Company<br>(Country)            | Refer-<br>ences             |
|------------------------|----------------------------------------------------------------------------------------------------------------------------------|--------------------|-------------------------------------------------------------------------------------------------------------------------------------------------------------------------------------------------------------------------------------------------------------------------------------------------------------------------------------------------------------------------------------------------------------------------------------------------------------------------------------------------------------------------------------------------------------------------------------------------------------------------------------------------------------------------------------------------------------------------------------------------------------------------|-----------------------------|---------------------------------------------------------------------------------------------------------------------------------------------------|------------------------|------------------------------------------------------------------------------------------------------------------------------------------------------------------------------------------------------------------------------------------------------------------------------------------------------------------|----------------------------------------------------------------------------|-----------------------------|--------------------------------------------------------------------------------------------------------------------------------------------------|--------------------------------------------------------------------------------------------------------------------------------------------------------------------------------------------------------------------------|----------------------------------------------------|------------------------------------------------------------------------------------------------------------------------------------------------------------------------------------------|---------------------------------------------------------------------------------------------------------------------------------------------------------------------------------------------------------------------------------------------------------------------------------|-------------------------------------------------------------------------------------------------------------------------------|----------------------------------------------------------------------------|----------------------------------------------------------------------------------------|---------------------------------------------------------------------------------------------------------------------------------------|----------------------------------------------|---------------------------------|-----------------------------|
| Aqua                   |                                                                                                                                  | Large              | <ul style="list-style-type: none"><li>multi-disciplinary study of the Earth's water cycle</li><li>study of the interrelated processes (atmosphere, oceans, and land surface) and their relationship to Earth system changes</li></ul>                                                                                                                                                                                                                                                                                                                                                                                                                                                                                                                                   | 2,934                       | <del>stowed configu-<br/>ration:</del><br>2.68 m × 2.47 m<br>× 6.49 m<br><del>deployed configu-<br/>ration:</del><br>4.81 m × 16.70<br>m × 8.04 m | 705<br>sun-synch       | 6 instruments, including<br><u>MODIS</u> ,<br><u>AMSR-E</u>                                                                                                                                                                                                                                                      | <u>MODIS</u> : 17.78<br>cm<br><u>AMSR-E</u> : 1.95<br>m × 1.7 m × 2.4<br>m | –                           | <u>MODIS</u> :<br>±49.5°<br><u>AMSR-E</u> :<br>0.18°–2.2°                                                                                        | <u>MODIS</u> :<br>250 m (2 bands),<br>500 m (5 bands),<br>1000 m (29 bands)<br>@ nadir<br><u>MODIS</u> :<br>900 to 1300 for 1 km<br>ocean color bands at<br>70° solar zenith an-<br>gle<br><u>AMSR-E</u> :<br>NEAT>1.1 K |                                                    | 2330 km (cross<br>track) by 10 km<br>(along track) @ nadir<br><u>AMSR-E</u> :<br>>1450 km                                                                                                | <u>MODIS</u> :<br>36 channels ranging from 0.4<br>μm to 14 μm<br><u>AMSR-E</u> :<br>12 channels at 6 discrete fre-<br>quencies from 6.9 GHz to 89<br>GHz (6.925, 10.65, 18.7, 23.8,<br>36.5, and 89.0 GHz)                                                                      | <u>MODIS</u> :<br>≥0.01 μm<br><u>AMSR-E</u> :<br>bandwidth be-<br>tween 350 and<br>3000 MHz                                   | yes:<br>AMSR-E:<br>H, V                                                    | 16 days                                                                                | A-train                                                                                                                               | 2002                                         | NASA<br>(USA)                   | [43, 56,<br>307,<br>308]    |
| Aura                   |                                                                                                                                  | Large              | <ul style="list-style-type: none"><li>global surveys of several atmos-<br/>pheric constituents, classified as<br/>anthropogenic sources (CFC<br/>types), radicals (e.g., ClO, NO,<br/>OH), reservoirs (e.g., HNO, HCl),<br/>and tracers (e.g., N<sub>2</sub>O, CO<sub>2</sub>, H<sub>2</sub>O)</li><li>mapping of temperature, geopo-<br/>tential heights, and aerosol fields</li><li>study of the chemistry and dyn-<br/>amics of ≤80 km Earth's atmos-<br/>phere</li><li>understanding the changing<br/>chemistry of Earth's atmosphere<br/>(ozone, air quality) due to the<br/>complex interactions of atmos-<br/>pheric constituents from both<br/>natural sources (biological activ-<br/>ity and volcanoes), and man-<br/>made sources (biomass burning)</li></ul> | 2,967                       | <del>stowed configu-<br/>ration:</del><br>2.68 m × 2.34 m<br>× 6.85 m<br><del>deployed configu-<br/>ration:</del><br>4.71 m × 17.03<br>m × 6.85 m | 705<br>SunSynch        | UV to MW instrument<br>package:<br><u>HIRDLS</u> (High-Resolution<br>Dynamics Limb Sounder)<br><u>MLS</u> (Microwave Limb<br>Sounder)<br><u>OMI</u> (Ozone Monitoring In-<br>strument) / 3 acquisition<br>modes,<br><u>TES</u> (Tropospheric Emis-<br>sion Spectrometer) / LIMB<br>or NADIR acquisition<br>modes | –                                                                          | –                           | <u>HRIDLS</u> :<br>22.1° to 27.3°<br>below hori-<br>zontal<br><u>MLS</u> :<br>Boresight<br>60–70° rela-<br>tive to nadir<br><u>OMI</u> :<br>114° | <u>MLS</u> :<br>@ 640 GHz:<br>1.5 km vertical × 3<br>km cross-track ×<br>300 km along-<br>track at the limb<br>tangent point<br><u>TES</u> :<br>0.5 km × 0.5 km @<br>nadir<br>2.3 km × 2.3 km @<br>limb                  | ≥100 to 5800 de-<br>pending on the data<br>product | <u>HIRDLS</u> :<br>2000–3000 km<br><br>OMI:<br>2600 km<br><u>TES</u> :<br>5.3 km × 8.5 km @<br>nadir<br>37 km × 23 km @<br>limb                                                          | <u>HIRDLS</u> :<br>21 channels ranging from<br>6.12–17.76 μm<br><u>MLS</u> :<br>5 bands at millimeter and sub-<br>millimeter wavelengths<br><u>OMI</u> :<br>UV-1: 270–314 nm<br>UV-2: 306–380 nm<br>VIS: 350–500 nm<br><u>TES</u> :<br>3.2–15.4 μm (650-3050 cm <sup>-1</sup> ) | <u>OMI</u> :<br>UV1: 0.42 nm<br>FWHM<br>UV2: 0.45 nm<br>FWHM<br>VIS: 0.63 nm<br>FWHM<br><u>TES</u> :<br>0.03 cm <sup>-1</sup> | no                                                                         | 16 days                                                                                | A-train<br>(Aqua in the lead<br>and Aura at the tail,<br>the nominal separa-<br>tion between Aqua<br>and Aura is about 15<br>minutes) | 2004 (>6<br>years)                           | NASA<br>(USA)                   | [43, 56,<br>308,<br>309]    |
| CSK                    | COSMO-<br>SkyMed 1<br>Generation<br>Constellation<br>of Small Satel-<br>lites for Medi-<br>terranean ba-<br>sin Observa-<br>tion | Medium/<br>Large   | <ul style="list-style-type: none"><li>frequent (&lt;1 day) and all-weather<br/>global Earth's observation</li><li>the relevant data exploitation for<br/>both the military and the civil<br/>(institutional, commercial) needs,<br/>as well to plan recovery activities<br/>in case of environmental disas-<br/>ters</li></ul>                                                                                                                                                                                                                                                                                                                                                                                                                                          | 1,700                       | 5.7 m × 1.4 m                                                                                                                                     | 620<br>sun-synch       | <u>SAR-2000</u><br>(Synthetic Aperture Radar)<br>/ 5 acquisition modes:<br><u>SL</u> : SpotLight (Frame), <u>SM</u> :<br>StripMap (HIMAGE), <u>WR</u> :<br>ScanSAR WideRegion, <u>HR</u> :<br>ScanSAR HugeRegion, <u>PP</u> :<br>Ping Pong                                                                       | 5.7 m × 1.4 m                                                              | –                           | 20–60°                                                                                                                                           | SL: ≤1 m<br>SM: 3 m (single) or<br>15 m (dual)<br>WR: 30 m (single)<br>HR: 100 m (dual)<br>PP: 15 m                                                                                                                      | –                                                  | SL: 10×10 km<br>SM: 40×40 km (sin-<br>gle) or 30×30 km<br>(dual)<br>WR: 100×100 km<br>(single)<br>HR: 200×200 km<br>(dual)<br>PP: 30 × 30 km                                             | X-band<br>9.6 GHz                                                                                                                                                                                                                                                               | maximum<br>radar<br>bandwidth of<br>400 MHz                                                                                   | yes: S, D                                                                  | constellation: 9<br>hours<br>(≤12 hours for<br>the full constel-<br>lation)            | Cosmo-SkyMed is<br>born as a constella-<br>tion of 4 satellites                                                                       | 2007 (>5<br>years)                           | ASI, MoD, e-<br>GEOS<br>(Italy) | [43, 56,<br>57, 63,<br>310] |
| CSG                    | COSMO-<br>SkyMed 2 <sup>nd</sup><br>Generation                                                                                   | Medium/<br>Large   | <ul style="list-style-type: none"><li>continuity service for EO to the<br/>1<sup>st</sup> generation (CSK) in several<br/>pplicative fields: risk manage-<br/>ment, cartography and planning,<br/>agriculture, forest, hydrology,<br/>geology, marine domain, archae-<br/>ology etc.</li><li>2 enhanced SAR Satellites<br/>(placed on the same orbit of the<br/>1<sup>st</sup> Generation), and an improved<br/>Ground Segment</li><li>both military and civil user clas-<br/>ses</li></ul>                                                                                                                                                                                                                                                                             | 2,400                       | 5.7 m × 1.4 m                                                                                                                                     | 620<br>sun-synch       | <u>CSG-SAR</u> (COSMO-<br>SkyMed Second Generation<br>Synthetic Aperture Radar) /<br>5 acquisition + 1 experi-<br>mental modes:<br><u>SL</u> : SpotLight, <u>SM</u> : Strip-<br>Map, <u>PP</u> : Ping Pong <u>QP</u> :<br>QuadPol, <u>SS</u> : ScanSAR,<br><u>DI2S</u> : Discrete Stepped<br>Strip               | 5.7 m × 1.4 m<br>(~7.5 m <sup>2</sup> )                                    | –                           | <u>Standard</u> :<br>20–60°<br><u>DI2S (Non-<br/>Standard)</u> :<br>20–45°                                                                       | SL-2A: 0.35 m ×<br>0.48/0.55 m<br>SL-2B: 0.63 m ×<br>0.63 m<br>SM: 3 × 3 m<br>PP: 12 × 5 m<br>QP: 3× 3 m<br>SS-1: 20 × 4 m<br>SS-2: 40 × 6 m<br>DI2S: 0.6 × 0.6 m                                                        | NESZ:<br>-22 dB                                    | SL-2A: 3 × 8 km<br>SL-2B: 10 × 10 km<br>SM: 40 × 40 km<br>PP: 30 × 30 km<br>QP: 40 × 15 km<br>SS-1: 100 × 100 km<br>SS-2: 200 × 200 km;<br>200 × 190 km<br>DI2S: 10 × 4 km (2<br>images) | X-band<br>9.6 GHz                                                                                                                                                                                                                                                               | Programmable                                                                                                                  | yes: S, D, Q<br>(HH, VV,<br>HH+VV,<br>HH+HV,<br>VV+VH,<br>HH/HV+V<br>V/VH) | 9.6 hours<br>(≤85 hours for<br>2 satellite constel-<br>lation cur-<br>rently in orbit) | CSG                                                                                                                                   | 2019 (7<br>nominal + 2<br>extended<br>years) | ASI, MoD<br>(Italy)             | [43, 56,<br>63,<br>311]     |

(continued)

|                                               |                                                                                     |        |                                                                                                                                                                                                                                                                                                                                                                                      |       |                                                                                                                      |                                   |                                                                                                                                                                                                                                                                                                             |                                                                                                                           |                         |                                                           |                                                      |                                                          |                                                                                   |                                                                                                                                                                                          |                                               |                                            |                               |                                                  |                                                      |                                                  |               |
|-----------------------------------------------|-------------------------------------------------------------------------------------|--------|--------------------------------------------------------------------------------------------------------------------------------------------------------------------------------------------------------------------------------------------------------------------------------------------------------------------------------------------------------------------------------------|-------|----------------------------------------------------------------------------------------------------------------------|-----------------------------------|-------------------------------------------------------------------------------------------------------------------------------------------------------------------------------------------------------------------------------------------------------------------------------------------------------------|---------------------------------------------------------------------------------------------------------------------------|-------------------------|-----------------------------------------------------------|------------------------------------------------------|----------------------------------------------------------|-----------------------------------------------------------------------------------|------------------------------------------------------------------------------------------------------------------------------------------------------------------------------------------|-----------------------------------------------|--------------------------------------------|-------------------------------|--------------------------------------------------|------------------------------------------------------|--------------------------------------------------|---------------|
| GeoEye-1                                      | formerly OrbView-5                                                                  | Large  | <ul style="list-style-type: none"><li>satellite imagery is used for a variety of purposes (e.g., defence, disaster response, air and marine transportation, oil and gas exploration, mining production and exploration, mapping of remote regions, location-based services, insurance and risk management, agricultural crop management)</li></ul>                                   | 1,955 | <u>stowed configuration:</u><br>4.35 m × 2.7 m                                                                       | 681 (770 after 2013)<br>sun-synch | <u>GIS</u> (GeoEye Imaging System)                                                                                                                                                                                                                                                                          | 1.1 m                                                                                                                     | f/12<br>13.3 m          | >1.28°                                                    | PAN: 0.41 @ nadir<br>MS: 1.64 @ nadir                | –                                                        | 15.2 km                                                                           | PAN: 450–900 nm<br>Blue: 450–510 nm<br>Green: 520–580 nm<br>Red: 655–690 nm<br>NIR: 780–920 nm                                                                                           | –                                             | no                                         | 3 days                        | WorldView Legion Constellation                   | 2008 (>7 years)                                      | GeoEye Inc. (USA)                                | [43, 56]      |
| GPM                                           | Global Precipitation Measurements                                                   | Large  | <ul style="list-style-type: none"><li>unify and advance precipitation measurements</li><li>microwave sensors for delivering next-generation global precipitation data products</li></ul>                                                                                                                                                                                             | 3,850 | 13 m × 6.5 m × 5 m                                                                                                   | 407<br>drift                      | <u>DPR</u> (Dual-frequency Precipitation Radar) / 7 operation modes<br><u>GMI</u> (GPM Microwave Imager)                                                                                                                                                                                                    | <u>DPR–KaPR:</u><br>1.44 m × 1.07 m × 0.7 m<br><u>DPR–KuPR:</u><br>2.4 m × 2.4 m × 0.6 m<br><u>GMI:</u><br>1.2 m diameter | –                       | ~17.5°                                                    | <u>DPR–KaPR:</u><br>5 km<br><u>DPR–KuPR:</u><br>5 km | <u>DPR–KaPR:</u><br>17 dBZ<br><u>DPR–KuPR:</u><br>13 dBZ | <u>DPR–KaPR:</u><br>120 km<br><u>DPR–KuPR:</u><br>245 km<br><u>GMI:</u><br>850 km | <u>DPR–KaPR:</u><br>33.5 GHz<br><u>DPR–KuPR:</u><br>13.6 GHz<br><u>GMI:</u><br>13 channels in the 10-183 GHz range + 4 high frequency, millimeter-wave channels near 166 GHz and 183 GHz | <u>GMI:</u> 100–600 MHz bandwidth             | <u>DPR:</u> no<br><u>GMI:</u> yes (H or V) | ≤2.5 days                     | GPM constellation (14 satellites including TRMM) | 2014 (3–5 years)                                     | NASA / JAXA (USA, Japan)                         | [43, 56]      |
| IKONOS-2                                      |                                                                                     | Medium | <ul style="list-style-type: none"><li>Earth’s observation via space-based telescope at very high resolution</li></ul>                                                                                                                                                                                                                                                                | 817   | 1.83 m × 1.57 m (hexagonal shape)                                                                                    | 681–709<br>sun-synch              | <u>OSA</u> (Optical Sensor Assembly)                                                                                                                                                                                                                                                                        | 0.70 m                                                                                                                    | f/14.3<br>10 m          | 0.75° along-track<br>1.19° cross-track                    | PAN: 1 m (0.82 m @ nadir)<br>MS: 4 m (3.2 m @ nadir) | >45                                                      | 11–13 km (11.3 km @ nadir)                                                        | PAN: 526–929 nm<br>Blue: 445–516 nm<br>Green: 506–595 nm<br>Red: 632–698 nm<br>NIR: 757–853 nm                                                                                           | PAN: 400 nm<br>MS: <100 nm                    | no                                         | 3 days @ 40° latitude         | no                                               | 1999–2015                                            | GeoEy (USA)                                      | [43, 56]      |
| Copernicus Sentinel 6 / JASON-CS (A and B)    | Copernicus Sentinel-6A Michael Freilich + Sentinel-6B / JASON-Continuity of Service | Large  | <ul style="list-style-type: none"><li>built on the heritage from the Jason series of satellites, Copernicus Sentinel-3 and ESA’s CryoSat mission</li><li>made up of two identical satellites flying in sequence</li><li>designed to provide operational measurements of sea surface height and wind speed to support operational oceanography and climate monitoring.</li></ul>      | 1,191 | <u>stowed configuration:</u><br>5.13 m × 2.58 m × 2.35 m<br><u>flight configuration:</u><br>5.13 m × 4.33 m × 2.35 m | 1336                              | <u>Poseidon-4</u> (Radar Altimeter)<br><u>AMR-C</u> (Advanced Microwave Radiometer for Climate)<br><u>DORIS</u> (Doppler Orbitography and Radiopositioning Integrated by Satellite),<br><u>LRA</u> (Laser Retroreflector Array),<br><u>GNSS-RO</u> (Global Navigation Satellite System - Radio Occultation) | <u>Poseidon-4:</u><br>1.2 m                                                                                               | –                       | –                                                         | <u>Poseidon-4:</u><br>300 m                          | <u>AMR-C:</u><br>NEAT ~ 0.1 K                            | –                                                                                 | <u>Poseidon-4:</u><br>C-band and Ku-band<br><u>AMR-C:</u><br>18.7 GHz, 23.8 GHz, and 34.0 GHz                                                                                            | <u>Poseidon-4:</u><br>320 MHz bandwidth       | <u>AMR-C:</u><br>yes (H or V)              | 9.92 days                     | JASON-3 tandem                                   | S-6A: 2020 (7 years)<br>S-6B: to be launched in 2025 | EU / ESA / EUMETSAT / NASA / NOAA (Europe / USA) | [43, 56]      |
| JPSS–1 (NOAA-20) to 4), as heritage of NPOESS |                                                                                     | Large  | <ul style="list-style-type: none"><li>technological and scientific advances in environmental monitoring, to improve environmental, weather, climate, and oceanographic science</li><li>increasing timeliness and accuracy of severe weather event forecasts</li><li>advanced imaging capability to analyze fires, volcanoes, Gulf oil tracking and other adverse incidents</li></ul> | 2,540 | 1.3 m × 1.3 m × 4.2 m                                                                                                | polar orbit, non-geo-synch        | <u>ATMS</u> (Advanced Technology Microwave Sounder)<br><u>CrIS</u> (Cross-track Infrared Sounder)<br><u>CERES</u> (Clouds and the Earth’s Radiant Energy System)<br><u>OMPS</u> (Ozone Mapping and Profiler Suite)<br><u>VIIRS</u> (Visible/Infrared Imager Radiometer Suite)                               | <u>VIIRS:</u><br>18.4 cm                                                                                                  | <u>VIIRS:</u><br>f/5.97 | <u>OMPS:</u><br>16.6° × 0.26°<br><u>VIIRS:</u><br>±55.84° | <u>OMPS:</u><br>50 km @ nadir                        | <u>OMPS:</u><br>35 @ 252 nm<br>400 @ 310 nm              | <u>OMPS:</u><br>250 km                                                            | <u>OMPS:</u><br>250–310 nm<br><u>VIIRS:</u><br>22 spectral bands (4 focal planes: VNIR, SWIR, MWIR, TIR)                                                                                 | <u>OMPS:</u><br>1 nm FWHM<br>2.4 samples/FWHM | <u>VIIRS:</u><br>dual                      | 0.5 day in constellation mode | yes: JPSS–1 to 4 is a series, plus NPOESS        | NOAA-20: 2017 (15 years)                             | NOAA                                             | [43, 56, 312] |

(continued)

|              |                                                                    |       |                                                                                                                                                                                                                                                                                                                                                                                                                                                                                                                                                                                                                                                          |       |                                                                                                                    |                                   |                                                                                                                                                                                                                                                                         |                                         |                         |                                                               |                                                                                                                                                                                                          |                                                                                                |                                                                                                                   |                                                                                                                                                                                                                                                                                                                                                                                                                                     |                                                                                                                                                                 |                                      |                                                                                                                            |                                                                            |                                                                                          |                                                                                           |               |
|--------------|--------------------------------------------------------------------|-------|----------------------------------------------------------------------------------------------------------------------------------------------------------------------------------------------------------------------------------------------------------------------------------------------------------------------------------------------------------------------------------------------------------------------------------------------------------------------------------------------------------------------------------------------------------------------------------------------------------------------------------------------------------|-------|--------------------------------------------------------------------------------------------------------------------|-----------------------------------|-------------------------------------------------------------------------------------------------------------------------------------------------------------------------------------------------------------------------------------------------------------------------|-----------------------------------------|-------------------------|---------------------------------------------------------------|----------------------------------------------------------------------------------------------------------------------------------------------------------------------------------------------------------|------------------------------------------------------------------------------------------------|-------------------------------------------------------------------------------------------------------------------|-------------------------------------------------------------------------------------------------------------------------------------------------------------------------------------------------------------------------------------------------------------------------------------------------------------------------------------------------------------------------------------------------------------------------------------|-----------------------------------------------------------------------------------------------------------------------------------------------------------------|--------------------------------------|----------------------------------------------------------------------------------------------------------------------------|----------------------------------------------------------------------------|------------------------------------------------------------------------------------------|-------------------------------------------------------------------------------------------|---------------|
| MetOp        | Meteorological<br>Operational<br>Satellite<br>Program of<br>Europe | Large | <ul style="list-style-type: none"><li>European undertaking providing weather data services to monitor the climate and improve weather forecasts</li><li>providing enhanced monitoring capabilities (complementary to Envisat) to fulfil the requirements to study the Earth’s climate system as expressed in a number of international cooperative programs such as: GCOS, IGBP, and WCRP</li><li>ensuring continuity and availability for operational purposes of polar meteorological observations from the “morning” orbit to the global user community</li></ul>                                                                                     | 4,085 | <u>launch configuration:</u><br>6.2 m × 3.4 m × 3.40 m<br><u>on-orbit configuration:</u><br>17.6 m × 6.7 m × 5.4 m | 817<br>near-circular<br>sun-synch | 13 instruments, including:<br><u>IASI</u> (Infrared Atmospheric Sounder Interferometer)<br><u>CIM-01</u> (Caméra Infrarouge Multimission / IASI Infrared Imager)<br><u>GOME-2</u> (Global Ozone Monitoring Experiment-2)                                                | –                                       | <u>CIM-01:</u><br>f/2.4 | <u>IASI:</u><br>±48.3°<br><u>CIM-01:</u><br>60 mrad × 60 mrad | <u>IASI:</u><br>12 km circular<br><u>CIM-01:</u><br>64 × 64 pixels<br><u>GOME-2:</u><br>40 km × 40 km (with 960 km swath and integration time of 0.1875 s)<br>40 km × 5 km (for polarization monitoring) | <u>IASI:</u><br>NEAT <0.228 K at 280 K for all bands<br><u>CIM-01:</u><br>NEAT < 0.5 K @ 280 K | <u>IASI:</u><br>50 km × 50 km @ nadir<br><u>GOME-2:</u><br>± 960 km, ±480 km, ±360 km, ±240 km, ±120 km           | <u>IASI:</u><br>B1: 645–1210 cm <sup>-1</sup> with 0.35 cm <sup>-1</sup> (unapodized resolution)<br>B2: 1210–2000 cm <sup>-1</sup> with 0.5 cm <sup>-1</sup> (apodized resolution)<br>B3: 2100–2760 cm <sup>-1</sup> with 1.5 cm <sup>-1</sup> (apodized resolution)<br><u>CIM-01:</u><br>10.3–12.5 µm<br><u>GOME-2:</u><br>4 bands in the 240–790 nm range<br>B1: 240–315 nm<br>B2: 311–403 nm<br>B3: 401–600 nm<br>B4: 598–790 nm | <u>IASI:</u><br><u>GOME-2:</u><br>0.35–0.5 cm <sup>-1</sup><br>B1: 0.22–0.28 nm FWHM<br>B2: 0.24–0.30 nm FWHM<br>B3: 0.40–0.50 nm FWHM<br>B4: 0.40–0.50 nm FWHM | <u>IASI</u> and <u>GOME-2:</u><br>no | 29 days                                                                                                                    | MetOp (3 satellites):<br>each satellite should be launched every 5–6 years | MetOp-A:<br>2006 (>5 years)<br>MetOp-B:<br>2012 (>5 years)<br>MetOp-C:<br>2018 (>5years) | ESA / EPS (Europe)                                                                        | [43, 56, 313] |
| Quick-Bird-2 |                                                                    | Large | <ul style="list-style-type: none"><li>providing high.resolution and commercial-focused imagery</li><li>obtaining images for change detection analysis in land usage, agriculture and forests.</li></ul>                                                                                                                                                                                                                                                                                                                                                                                                                                                  | 1,100 | 3.04 m (height) × 1.6 m (diameter)                                                                                 | 450<br>sun-synch                  | <u>BGIS2000</u> Instrument<br>Parameters /<br>4 acquisition modes:<br><u>SN</u> : SnapShot mode,<br><u>SM</u> : StripMap<br><u>MM</u> : Mosaic Mode<br><u>ST</u> : Stereo Mode                                                                                          | 60 cm                                   | f/14.7<br>8.8 m         | 2.12°                                                         | PAN: 0.61–0.72 m<br>MS: 2.4–2.6 m                                                                                                                                                                        | –                                                                                              | @ 450 km altitude:<br>SN: 16.5 km × 16.5 km<br>SM: 16.5 km × 225 km<br>MM: 32 km × 32 km<br>ST: 16.5 km × 16.5 km | PAN + 4 MS:<br>PAN: 450–900 nm<br>Blue: 450–520 nm<br>Green: 520–600 nm<br>Red: 630–690 nm<br>NIR: 760–900 nm                                                                                                                                                                                                                                                                                                                       | –                                                                                                                                                               | no                                   | 2.8 days at 1-metre GSD resolution<br>1.5 days at 1.5-metre GSD resolution<br>These values are for targets at 20° latitude | no                                                                         | 2001–2015                                                                                | Digital-Globe Inc. (formerly Earth-Watch), then acquired by Maxar Technologies Ltd. (USA) | [43, 56]      |
| SeaSat       |                                                                    | Large | <ul style="list-style-type: none"><li>pioneering and demonstrating the techniques to study oceanography on a global scale from remote sensing data</li><li>proving the viability of imaging radar for studying our planet</li><li>ice and ocean monitoring (sea-surface winds, sea-surface temperatures, wave heights, internal waves, sea-ice features, ocean features, ocean topography, and the marine geoid), land use, geology, forestry, and mapping.</li><li>providing timely oceanographic data to scientists studying marine phenomena, and to users of the oceans as a resource (ocean shippers, fishermen, marine geologists, etc.)</li></ul> | 2,290 | 21 m (length) × 1.5 m (diameter)                                                                                   | 799 km × 775 km                   | Sensor module with 5 active and passive instruments:<br><u>SAR antenna</u><br><u>SMRR</u> (Scanning Multichannel Microwave Radiometer)<br><u>ALT</u> (Radar Altimeters)<br><u>SASS</u> (Seasat-A Scatterometer System)<br><u>VIRR</u> (Visible and Infrared Radiometer) | <u>SAR:</u><br>23 m² (10.74 m × 2.16 m) | –                       | 6.2° (elevation) × 1° (azimuth)                               | 25 m × 25 m                                                                                                                                                                                              | –                                                                                              | 100 km                                                                                                            | L-band:<br>1.275 GHz (23.5 cm)                                                                                                                                                                                                                                                                                                                                                                                                      | bandwidth (linear FM) = 19.077 MHz                                                                                                                              | <u>SAR:</u> yes (HH)                 | 17 days                                                                                                                    | no                                                                         | 1978–1978 (110-day lifetime due to a malfunctioning)                                     | NASA/JPL (USA)                                                                            | [43, 56]      |

(continued)

|                  |                                    |              |                                                                                                                                                                                                                                                                                                                                                                                                                                                                                                                                                                                                                                                                                                                                              |       |                          |                                                                                        |                                                                                                                                                                                                                                                                                                                                    |                    |                                                                |                                    |                                                                   |                                                  |                                                                       |                                                                                                                    |                                                                                                      |                              |                     |                                                                                                                                       |                                        |                            |                    |
|------------------|------------------------------------|--------------|----------------------------------------------------------------------------------------------------------------------------------------------------------------------------------------------------------------------------------------------------------------------------------------------------------------------------------------------------------------------------------------------------------------------------------------------------------------------------------------------------------------------------------------------------------------------------------------------------------------------------------------------------------------------------------------------------------------------------------------------|-------|--------------------------|----------------------------------------------------------------------------------------|------------------------------------------------------------------------------------------------------------------------------------------------------------------------------------------------------------------------------------------------------------------------------------------------------------------------------------|--------------------|----------------------------------------------------------------|------------------------------------|-------------------------------------------------------------------|--------------------------------------------------|-----------------------------------------------------------------------|--------------------------------------------------------------------------------------------------------------------|------------------------------------------------------------------------------------------------------|------------------------------|---------------------|---------------------------------------------------------------------------------------------------------------------------------------|----------------------------------------|----------------------------|--------------------|
| 4 of 9           |                                    |              |                                                                                                                                                                                                                                                                                                                                                                                                                                                                                                                                                                                                                                                                                                                                              |       |                          |                                                                                        |                                                                                                                                                                                                                                                                                                                                    |                    |                                                                |                                    |                                                                   |                                                  |                                                                       |                                                                                                                    |                                                                                                      |                              |                     |                                                                                                                                       |                                        |                            |                    |
| S-1A<br>S-1B     | Copernicus<br>Sentinel 1A<br>and B | Large        | <ul style="list-style-type: none"> <li>representing the first new space component of the GMES (Global Monitoring for Environment and Security) satellite family, and the EU contribution to GEOSS (Global Earth Observation System of Systems)</li> <li>ERS/ENVISAT SAR data continuity for Land and Ocean surveillance</li> <li>independent operational capability for continuous radar mapping of the Earth: to provide enhanced revisit frequency, coverage, timeliness and reliability for operational services and applications requiring long time series, an operational interferometry capability through stringent requirements placed on attitude accuracy, attitude and orbit knowledge, and data-take timing accuracy</li> </ul> | 2,300 | 3.4m × 1.3 m × 1.3 m     | 693 tube of 50 m (RMS) wide in radius, around the nominal operational path<br>SunSynch | <u>C-SAR</u> / 4 acquisition modes:<br><u>SM</u> : StripMap, <u>IW</u> : Interferometric Wide Swath Mode, <u>EW</u> : Extra Wide Swath Mode, <u>WV</u> : Wave mode                                                                                                                                                                 | 12.3 m × 0.821 m   | –                                                              | –                                  | SM: 5 × 5 m²<br>IW: 5 × 20 m²<br>EW: 25 × 100 m²<br>WV: 5 × 20 m² | NESZ:<br>σ <sup>0</sup> =–25 d                   | SM: 80 km<br>IW: 250 km<br>EW: 400 km<br>WV: 20 × 20 km² every 100 km | C-band:<br>5.405 GHz                                                                                               |                                                                                                      | yes: S, D (HH, HH+HV, VV+VH) | 12 days             | constellation of two polar-orbiting satellites (S-1A and S-1B), sharing the same orbital plane with a 180° orbital phasing difference | S-1A: 2014<br>S-1B: 2016 (>7.25 years) | ESA, EC (Europe)           | [43, 56, 63, 314]  |
| S-5P             | Sentinel-5P (Precursor)            | Medium-Large | <ul style="list-style-type: none"> <li>first atmospheric composition mission in the frame of the European Earth Observation programme Copernicus</li> <li>providing routine high spatio-temporal resolution observations of atmospheric trace gases and aerosols products serving air quality, climate and stratospheric ozone applications (tracked gases: BrO, CH<sub>4</sub>, ClO, CO, CO<sub>2</sub>, H<sub>2</sub>O, HCHO, N<sub>2</sub>O, NO, NO<sub>2</sub>, NO<sub>3</sub>, O<sub>2</sub>, O<sub>3</sub>, O<sub>4</sub>, OClO, SO<sub>2</sub>, and aerosol)</li> </ul>                                                                                                                                                               | ~900  | 1.40 m × 0.65 m × 0.75 m | 824 sun-synch                                                                          | <u>TROPOMI</u> (TROPOspheric Monitoring Instrument)                                                                                                                                                                                                                                                                                | 100                | f/9 × f/10 aperture: 34 mm (cross-track) × 68 mm (along-track) | 108°                               | 7 × 7 km² @ nadir                                                 | B1:1000<br>B2: 500<br>B3: 100                    | 2670 km                                                               | 8 bands covering:<br>UV and VIS: 270– 500 nm<br>NIR: 675–775 nm<br>SWIR: 2305–2385 nm                              | B1: 0.55 nm<br>B2: 0.55 nm<br>B3: 0.25 nm                                                            | yes: D                       | 12 days             | kept within the 3000 km VIIRS swath of Suomi NPP                                                                                      | 2017 (7 years)                         | ESA, NSO (Europe)          | [43, 56, 314, 315] |
| SMOS             | Soil Moisture and Ocean Salinity   | Medium       | <ul style="list-style-type: none"> <li>improve our understanding of Earth’s water cycle, providing much-needed data for modelling of the weather and climate, and increasing the skill in numerical weather and climate prediction</li> <li>main goal: demonstrate observations of SSS over oceans and SM over land to advance climatology, meteorologic, hydrologic, and oceanographic applications</li> </ul>                                                                                                                                                                                                                                                                                                                              | 658   | 1 m × 1 m × 1 m          | 755 km sun-synch                                                                       | <u>MIRAS</u> (Microwave Imaging Radiometer using Aperture Synthesis)                                                                                                                                                                                                                                                               | –                  | –                                                              | –                                  | 20 km                                                             | –                                                | 900 km                                                                | L-band: 1.4 GHz                                                                                                    | 1400-1427 MHz                                                                                        | yes: H, V polarization       | 1–10 days (for SSS) | –                                                                                                                                     | 2009 (>3 years)                        | ESA                        | [43, 56]           |
| TOPEX / Poseidon | Topography Experiment / Poseidon   | Large        | <ul style="list-style-type: none"> <li>a cooperative Earth observation mission of the USA and France (NASA/JPL and CNES as partners) with the overall objective to provide high-accuracy global sea level (ocean height) measurements in coordinates relative to the center of the Earth. From this information, ocean circulation patterns can be mapped. The T/P data analysis helps to understand how the oceans interact with the atmosphere, and improve our ability to predict the global climate.</li> </ul>                                                                                                                                                                                                                          | 2,388 | 5.5 m × 6.6 m × 2.8 m    | 1336 drift                                                                             | <u>NRA</u> (NASA Radar Altimeter)<br><u>TMR</u> (TOPE× Microwave Radiometer)<br><u>GPSDR</u> (GPS Demonstration Receiver)<br><u>SSALT</u> ) / <u>Poseidon-1</u> (Single-Frequency Solid-State Altimeter)<br><u>LRA</u> (Laser Reflector Array)<br><u>DORIS</u> (Doppler Orbitography and Radiopositioning Integrated by Satellite) | <u>NRA</u> : 1.5 m | –                                                              | <u>NRA</u> : 1.1° (Ku)<br>2.7° (C) | –                                                                 | <u>NRA</u> : 3.2 dB (Ku-band)<br>0.9 dB (C-band) | <u>TMR</u> : 35 km                                                    | <u>NRA</u> :<br>C-band: 5.3 GHz<br>Ku-band: 13.575 GHz<br><u>SSALT</u> / <u>Poseidon-1</u> :<br>Ku-band: 13.65 GHz | <u>NRA</u> :<br>C-band: 100 MHz<br>Ku-band: 320 MHz<br><u>SSALT</u> / <u>Poseidon-1</u> :<br>300 MHz | no                           | 10 days             | JASON-1 tandem                                                                                                                        | 1992–2005                              | NASA / CNES (USA, Frances) | [43, 56]           |

(continued)

|     |            |       |                                                                                                                                |       |                               |                           |                                     |                |   |   |                               |                                        |                                               |                                      |   |              |         |                                      |                   |                      |                  |
|-----|------------|-------|--------------------------------------------------------------------------------------------------------------------------------|-------|-------------------------------|---------------------------|-------------------------------------|----------------|---|---|-------------------------------|----------------------------------------|-----------------------------------------------|--------------------------------------|---|--------------|---------|--------------------------------------|-------------------|----------------------|------------------|
| TSX | TerraSAR-X | Large | <ul style="list-style-type: none"> <li>making multi-mode and high-resolution X-band data available for a wide spec-</li> </ul> | 1,230 | <u>launch configuration</u> : | 505 km × 533 km sun-synch | <u>X-SAR</u> / 5 acquisition modes: | 4.78 m × 0.7 m | – | – | HS: 1 m<br>SL: 1 m<br>ES: 1 m | HS: -23 dB<br>SL: -23 dB<br>ES: -20 dB | HS: 5×10 km²<br>SL: 10×10 km²<br>ES: 5×10 km² | X-band: 9.65 GHz / 3.1 cm wavelength | – | yes: S, D, Q | 11 days | yes (its twin satellite is TanDEM-X) | 2007 (>5.5 years) | BMBF / DLR (Germany) | [43, 56, 57, 63] |
|-----|------------|-------|--------------------------------------------------------------------------------------------------------------------------------|-------|-------------------------------|---------------------------|-------------------------------------|----------------|---|---|-------------------------------|----------------------------------------|-----------------------------------------------|--------------------------------------|---|--------------|---------|--------------------------------------|-------------------|----------------------|------------------|

|      |                                     |       |                                                                                                                                                                                                                  |       |                                                                                                                                                  |                                                       |                                                                                                                                                                                                                         |                                                                      |                 |                                                  |                                                                                                                                                                                   |                          |                                                                                                                                                                       |                                                                                                                                                                                                                                                                                                                            |                                                                    |                               |                                                                 |                                                      |                    |                                                                    |                   |
|------|-------------------------------------|-------|------------------------------------------------------------------------------------------------------------------------------------------------------------------------------------------------------------------|-------|--------------------------------------------------------------------------------------------------------------------------------------------------|-------------------------------------------------------|-------------------------------------------------------------------------------------------------------------------------------------------------------------------------------------------------------------------------|----------------------------------------------------------------------|-----------------|--------------------------------------------------|-----------------------------------------------------------------------------------------------------------------------------------------------------------------------------------|--------------------------|-----------------------------------------------------------------------------------------------------------------------------------------------------------------------|----------------------------------------------------------------------------------------------------------------------------------------------------------------------------------------------------------------------------------------------------------------------------------------------------------------------------|--------------------------------------------------------------------|-------------------------------|-----------------------------------------------------------------|------------------------------------------------------|--------------------|--------------------------------------------------------------------|-------------------|
|      |                                     |       | trum of scientific applications in such fields as: hydrology, geology, climatology, oceanography, environmental and disaster monitoring, and cartography (DEM generation) through interferometry and stereometry |       | 5 m (length) × 2.4 m (diameter)                                                                                                                  |                                                       | <u>HS</u> : High Resolution SpotLight, <u>SL</u> : SpotLight, <u>ES</u> : Experimental Spotlight, <u>SM</u> : Strip-Map, <u>SC</u> : ScanSAR                                                                            |                                                                      |                 |                                                  | SM: 3 m<br>SC: 16 m                                                                                                                                                               | SM: -22 dB<br>SC: -21 dB | SM: ≤1500×30 km²<br>SC: ≤1500×100 km²                                                                                                                                 |                                                                                                                                                                                                                                                                                                                            |                                                                    | (HH, VV, HV, VH)              |                                                                 |                                                      |                    |                                                                    |                   |
| TRMM | Tropical Rainfall Measuring Mission | Large | <ul style="list-style-type: none"><li>goals: global change studies</li><li>developing an interdisciplinary understanding of atmospheric circulation, ocean-atmospheric coupling, and tropical biology</li></ul>  | 3,620 | <u>launch configuration</u> :<br>5.1 m (length) × 3.7 m (diameter)<br><u>orbit configuration</u> :<br>5.1 m (length) × 14.6 m (paddle direction) | 350.0–402.5 km (pre-boost – post-boost in 2001) drift | <u>PR</u> (Precipitation Radar)<br><u>VIRS</u> (Visible Infrared Scanner)<br><u>TMI</u> (TRMM Microwave Imager)<br><u>CERES</u> (Clouds and the Earth’s Radiant Energy System)<br><u>LIS</u> (Lightning Imaging Sensor) | <u>PR</u> :<br>2.0 × 2.0 m<br><u>TMI</u> :<br>61 cm<br>aperture size | –               | <u>VIRS</u> :<br>±45°<br><u>LIS</u> :<br>80°×80° | <u>PR</u> :<br>4.3–5.0 km<br><u>TMI</u> :<br>4.4–5.1 km<br>@85.5 GHz<br><u>VIRS</u> :<br>2.2–2.4 km<br><u>CERES</u> :<br>10 km @ nadir<br><u>LIS</u> :<br>4 km @ nadir            | –                        | <u>PR</u> :<br>215–247 km<br><u>TMI</u> :<br>760–878 km<br><u>VIRS</u> :<br>720–833 km<br><u>CERES</u> :<br>scan angle: ±78° (global)<br><u>LIS</u> :<br>600 × 600 km | <u>PR</u> :<br>13.8 GHz<br><u>TMI</u> :<br>10.7, 19.4, 21.3, 37, and 85.5 GHz<br><u>VIRS</u> :<br>0.63, 1.6, 3.75, 10.7, and 12 μm<br><u>CERES</u> :<br>0.3–5 μm<br>8.0–12.0 μm<br>0.3–100 μm<br><u>LIS</u> :<br>0.7774 μm                                                                                                 | <u>VIRS</u> :<br>±0.05 μm<br><u>TMI</u> :<br>100–300 MHz bandwidth | <u>TMI</u> : yes: S, D (V, H) | 12 hours                                                        | yes: GPM constellation (10 satellites including GPM) | 1997–2015          | NASA / JAXA (USA, Japan)                                           | [43, 56]          |
| WV1  | WorldView-1                         | Large | <ul style="list-style-type: none"><li>successor of QuickBird-2, to provide high-resolution imagery from the next-generation commercial imaging satellites</li></ul>                                              | 2,500 | 3.6 m (height) × 2.5 m (diameter)                                                                                                                | 496 sun-synch                                         | <u>WV60</u> (WorldView-60 camera)                                                                                                                                                                                       | 60 cm                                                                | f/14.7<br>8.8 m | 2.12°                                            | PAN: 50 cm @ nadir and 55 cm @ 20° off-nadir                                                                                                                                      | –                        | 17.6 km @ nadir                                                                                                                                                       | PAN-1: 400–900 nm<br>MS1-NIR1: 770–895 nm<br>MS2-Red: 630–690 nm<br>MS3-Green: 510–580 nm<br>MS4-Blue: 450–510 nm<br>MS5-Red Edge: 705–745 nm<br>MS6-Yellow: 585–625 nm<br>MS7-Coastal: 400–450 nm<br>MS8-NIR2: 860–1040 nm                                                                                                | –                                                                  | no                            | ≤1.7 days @ 1 m GSD<br>≤5.9 days @ 20° off-nadir (0.51 m GSD)   | WorldView Legion Constellation                       | 2007 (7.25 years)  | Digital-Globe Inc., then acquired by Maxar Technologies Ltd. (USA) | [43, 56]          |
| WV2  | WorldView-2                         | Large | <ul style="list-style-type: none"><li>overall objective of meeting the growing commercial demand for high-resolution satellite imagery</li></ul>                                                                 | 2,800 | <u>stowed configuration</u> :<br>4.3 m (height) × 2.5 m (diameter)<br><u>deployed solar array configuration</u> :<br>7.1 m (width)               | <u>770 sun-synch</u>                                  | <u>WV110</u> (WorldView-110 camera)                                                                                                                                                                                     | 110 cm                                                               | f/12<br>13.3 m  | >1.28°                                           | PAN: 0.46 m @ nadir and 0.52 m @ 20° off-nadir<br>MS: 1.8 m @ nadir and 2.4 m @ 20° off-nadir                                                                                     | –                        | 16.4 km                                                                                                                                                               | PAN-2: 450–800 nm<br>MS1-NIR1: 770–895 nm<br>MS2-Red: 630–690 nm<br>MS3-Green: 510–580 nm<br>MS4-Blue: 450–510 nm<br>MS5-Red Edge: 705–745 nm<br>MS6-Yellow: 585–625 nm<br>MS7-Coastal: 400–450 nm<br>MS8-NIR2: 860–1040 nm                                                                                                | –                                                                  | no                            | 1.1 days                                                        | WorldView Legion Constellation                       | 2009 (7.25 years)  | Digital-Globe Inc., then acquired by Maxar Technologies Ltd. (USA) | [43, 56, 316]     |
| WV3  | WorldView-3                         | Large | <ul style="list-style-type: none"><li>providing multispectral images with an unprecedented combination of high spatial and spectral resolutions</li></ul>                                                        | 2,800 | <u>stowed configuration</u> :<br>5.7 m (height) × 2.5 m (diameter)<br><u>deployed solar array configuration</u> :<br>7.1 m (width)               | 617 sun-synch                                         | <u>WV-3 Imager</u> (WV110, the same as in WV-2 satellite)<br><u>CAVIS</u> (Clouds, Aerosols, Vapors, Ice, and Snow)                                                                                                     | 110 cm                                                               | f/12<br>16.0 m  | >1.28°                                           | <u>WV-3</u> :<br>PAN: 0.31 m @ nadir and 0.34 m @ 20° off-nadir<br>MS: 1.24 @ nadir and 1.38 m @ 20° off-nadir<br>SWIR: 3.7 m and 4.1 m @ 20° off-nadir<br><u>CAVIS</u> :<br>30 m | –                        | 13.1 km<br>10 km SWIR @ nadir                                                                                                                                         | <u>WV-3</u> :<br>PAN: 450–800 nm<br>Coastal Blue: 400–450 nm<br>Blue: 450–510 nm<br>Green: 510–580 nm<br>Yellow: 585–625 nm<br>Red: 630–690 nm<br>Red Edge: 705–745 nm<br>NEAR-IR1: 770–895 nm<br>Near-IR2: 860–1040 nm<br>8 bands in the SWIR in the range: 1195–2365 nm<br><u>CAVIS</u> :<br>12 bands in the 405–2245 nm | –                                                                  | no                            | < 1.0 days @ 1 m GSD<br>≤4.5 days for an off-nadir angle of 20° | WorldView Legion Constellation                       | 2014 (>7.25 years) | Digital-Globe Inc., then acquired by Maxar Technologies Ltd. (USA) | [43, 56, 63, 317] |

(continued)

|     |                        |       |                                                                                                                                                                                                                                                                                                                                                                              |       |                                                                                                                                  |               |                           |        |                |        |                                           |   |                 |                                                                                                |   |    |         |                                |           |                                                                    |          |
|-----|------------------------|-------|------------------------------------------------------------------------------------------------------------------------------------------------------------------------------------------------------------------------------------------------------------------------------------------------------------------------------------------------------------------------------|-------|----------------------------------------------------------------------------------------------------------------------------------|---------------|---------------------------|--------|----------------|--------|-------------------------------------------|---|-----------------|------------------------------------------------------------------------------------------------|---|----|---------|--------------------------------|-----------|--------------------------------------------------------------------|----------|
| WV4 | WorldView-4 / GeoEye-2 | Large | <ul style="list-style-type: none"><li>• next very high resolution imaging satellite providing high resolution and color imagery to commercial, government and international customers</li><li>• delivering critical geospatial situational awareness and global security information to intelligence analysts, war fighters, decision makers, and commercial users</li></ul> | 2,067 | <u>stowed configuration:</u><br>5.3 m (height) × 2.5 m (diameter)<br><u>deployed solar array configuration:</u><br>7.9 m (width) | 617 sun-synch | SpaceView™ Imaging System | 110 cm | f/12<br>16.0 m | >1.28° | PAN: 0.31 m @ nadir<br>MS: 1.24 m @ nadir | – | 13.1 km @ nadir | PAN: 450–800 nm<br>Blue: 450–510 nm<br>Green: 510–580 nm<br>Red: 655–690 nm<br>NIR: 780–920 nm | – | no | ≤3 days | WorldView Legion Constellation | 2016–2019 | Digital-Globe Inc., then acquired by Maxar Technologies Ltd. (USA) | [43, 56] |
|-----|------------------------|-------|------------------------------------------------------------------------------------------------------------------------------------------------------------------------------------------------------------------------------------------------------------------------------------------------------------------------------------------------------------------------------|-------|----------------------------------------------------------------------------------------------------------------------------------|---------------|---------------------------|--------|----------------|--------|-------------------------------------------|---|-----------------|------------------------------------------------------------------------------------------------|---|----|---------|--------------------------------|-----------|--------------------------------------------------------------------|----------|

\* The years of the missions are given as interval when it is a past mission. When only one date is given, this refers to the launch date. The eventual numbers in brackets refers to the expected lifetime as given in the references.
